## **Fetal origin of sex-bias brain aging**

Maliha Islam<sup>1</sup>, Monica Strawn<sup>1</sup>, Susanta K. Behura<sup>1,2,\*</sup>

<sup>1</sup>Division of Animal Sciences, <sup>2</sup>MU Institute for Data Science and Informatics

University of Missouri, Columbia MO 65211

United States of America

\*Correspondence: Susanta K. Behura

Email: behuras@missouri.edu

ORCID: 0000-0003-1057-2435

**Keywords:** Brain aging, epigenetic clock, developmental aging, fetal brain programming, sexual dimorphism

## **Abstract**

DNA methylation plays crucial roles during fetal development as well as aging. Whether the aging of the brain is programmed at the fetal stage remains untested. To test this hypothesis, mouse epigenetic clock (epiclock) was profiled in fetal (gestation day 15), postnatal (day 5), and aging (week 70) brain of male and female C57BL/6J inbred mice. Data analysis showed that on week 70 the female brain was epigenetically younger than the male brain. Predictive modeling by neural network identified specific methylations in the brain at the developing stages that were predictive of epigenetic state of the brain during aging. Transcriptomic analysis showed coordinated changes in expression of epiclock genes in the fetal brain relative to placenta. Whole-genome bisulfite sequencing identified sites that were methylated both in the placenta and fetal brain in a sex-specific manner. Epiclock genes and genes associated with specific signaling pathways, primarily the gonadotropin-releasing hormone receptor (GnRHR) pathway, were associated with these sex-bias methylations in the placenta as well as fetal brain. Transcriptional crosstalk among the epiclock and GnRHR pathway genes was evident in the placenta that was maintained in the brain during development as well as aging. Collectively, these findings suggest that sex differences in the aging of brain are of fetal origin and epigenetically linked to the placenta.

## **Introduction**

The Dilman theory of developmental aging (DevAge) (1) suggests that mechanisms that regulate developmental processes early in life have commonalities with the processes that regulate aging. Genomics and systems-biology studies have supported the DevAge theory

and have further revealed that the developmental aging link is evolutionarily conserved between mice and human (2, 3). The connection of aging with reproduction has been suggested in multiple studies (4–6). Gestation length (7), placenta development (8), and fertility (9) influences on aging and longevity. Furthermore, sex also influences differential aging of organs (10). Different organs show differential gene expression changes during aging that are sex-specific (11). In humans, the female brain remains persistently younger than the male brain (12, 13).

DNA methylation is a major factor of epigenetic regulation of aging (14–17).

Methylation, the majority of which occur in CpGs (5'-Cytosine-phosphate-Guanine-3') sites, changes in correlation with age. They are commonly referred to as epigenetic clock (epiclock) and serve as reliable predictors of the biological age of organs. Several studies have profiled methylation changes in the brain during aging (17–19) and in the developing brain at fetal stages and found that aberrant methylation in the fetal brain can influence the risk of brain diseases later in life (20, 21). Commonalities in morphometric changes have also been observed in the brain during development and aging (22). These studies have collectively suggested that processes that regulate the development and aging of the brain are not mutually exclusive. Mice models have provided further insights into epigenetic regulation of brain during development and aging (23–26), including influence of sex on epigenetic control of brain development and function (27–29).

While the role of placenta in fetal programming is well documented (30–34), recent studies show that the placenta plays adaptive roles to safeguard fetal brain development from adverse conditions during pregnancy (35). Our earlier study showed a coordinated

changes of specific receptor and ligand genes between the placenta and fetal brain, suggesting their roles in the regulation of the brain-placental axis in mice (36). In addition, we also found evidences for differential expression of specific aging genes in the male and female fetal brain in response to ablation of uterine *Foxa2*, an essential gene required for pregnancy establishment (37). We also showed that specific genes are regulated in a sex-bias manner during fetal brain development in pigs (38). Furthermore, studies by others have shown that epigenetic and metabolic changes in the fetal brain can impact overall health later in life (34, 35) particularly in the context of declining metabolism in the brain (36, 37). However, the epigenetic connection between development and aging of brain remains poorly studied. The present study aims to test if development and aging of brain have epigenetic links and determine if such links are influenced by fetal sex and placenta.

## **Materials and Methods**

### ***Ethics statement***

All animal procedures were approved by the Institutional Animal Care and Use Committee of the University of Missouri and were conducted according to the National Institute of Health Guide for the Care and Use of Laboratory Animals.

### ***Animals***

Adult C57BL/6J mice were mated. The day vaginal plug was observed that was considered as gestation day (GD) 1. On GD15, dams were euthanized in CO<sub>2</sub> followed by cervical dislocation. We selected GD15 because the placenta is fully developed, and

the brain-placental crosstalk was confirmed at this time point (36). The placenta was carefully separated from the metrial gland and decidua, and the fetal brain was collected using curved forceps. All the samples were washed in PBS and snap-frozen in liquid nitrogen. Sex was determined by PCR (39). A total of 12 fetal brains and placenta were collected (3 replicates x 2 tissue types x 2 sexes). We further collected three replicates of male and female brains from postnatal day 5 (PND5) and 70 weeks old mice (WK70).

### ***Epigenetic clock profiling***

Mouse multi-tissue epigenetic clock was profiled with DNA of GD15, PND5 and WK70 male and female brains using the Zymo (ZYMO RESEARCH, Irvine, CA 92614, U.S.A) DNAge® estimation service, which is based the Horvath pan-tissue clock using elastic net regression (40). Briefly, DNA from frozen brain samples was purified using the Quick-DNATM Miniprep Plus kit (Cat. No. D4068). Bisulfite conversion was performed using the EZ DNA Methylation-LightningTM Kit (Cat. No. D5030), followed by enrichment for target loci and sequencing on an Illumina® HiSeq instrument. Sequence reads were identified using Illumina base calling software and aligned to the mouse reference genome (GRCm38) using *Bismark* (41) which was also used for methylation calling. Methylation level was estimated as the proportion of reads mapped to each cytosine relative to the total number mapped reads to the site. The methylation data of each brain sample was then compared with cortex aging data of mouse by Zymo's DNAge® predictor tool as described earlier (42).

### ***Whole-genome bisulfite sequencing (WGBS)***

Genomic DNA was extracted from GD15 fetal brain and placenta of both sexes using *Genra Puregene Tissue Kit* (catalog #158667, Qiagen) as per the manufacturer's instruction. Equimolar amounts of DNA from the three biological replicates were pooled together for each sample that used for methylation analysis as described earlier (43). After bisulfite conversion of DNA, sequencing libraries were generated using the NEBNext® Ultra™ II DNA Library Prep Kit (New England Biolabs, MA). Library preparation and sequencing were performed at the University of Missouri Genomics Technology Core. The libraries were sequenced to 20x genome coverage (150 bases sequence reads) using NovaSeq 6000.

### ***WGBS data analysis***

The raw data were subjected to quality control by *TrimGalore* followed by mapping to the reference genome (GRCm38) by *Bismark* (41). Briefly, the reference GRCm38 genome sequences were bisulfite converted and indexed using the '*bismark\_genome\_preparation*' function before mapping. The read alignment was then performed by *bowtie2* aligner implemented within *Bismark* (44). The methylation sites were extracted using *thebismark\_methylation\_extractor* to generate methylation coverage of each sample in a genome-wide manner. The coverage files contained chromosome name, start position, end position, methylation percentage, and number of methylated, and unmethylated reads for each CpG site. We only focused on CpG sites as they represent the majority of methylations in mammalian genomes (45). The sites that had low coverage (read counts < 8) were excluded from further analysis (46). The count data

was converted to beta-values of methylation as described earlier (47). The raw and processed data are available in GEO accession# GSE157553.

### ***Genomic distribution of methylation sites***

*BEDTools* (48) was used to identify methylations in different genomic locations based on genome annotation (GRCm38) obtained from UCSC Genome Browser. In addition, *awk* and *grep* were used to filter and count methylation sites in different annotation features.

### **RNA-seq**

RNA-seq was performed to profile gene expression of male and female brains collected on PND5 and WK70. The RNA-seq data of brain and placenta from male and female fetuses (GD15) was compared with RNA-seq data of PND5 and WK70 brain. The GD15 RNA-seq data was generated earlier by us (37) which are also publicly available in the Gene Expression Omnibus database (accession # GSE157555). Total RNA was isolated from PND5 and WK70 brain samples using TRIzol (Catalog 15596026, Thermo Fisher) based protocol. The RNA quality was checked using a Fragment Analyzer (Advanced Analytical Technologies). The RNA concentration was determined using a Qubit 2.0 Fluorometer (Life Technologies). Libraries were prepared from total RNA using the Illumina TruSeq Stranded Total RNA with Ribo-Zero Gold Library Prep Kit at the University of Missouri Genomics Technology Core. Each library was sequenced (~30 million paired-end reads, 150 bases read length) using Illumina NovaSeq 6000 sequencer.

### ***RNA-seq data analysis***

RNA-seq data analysis was performed as described in our earlier studies (37, 38). Briefly, the quality of raw sequences was checked with FastQC followed by trimming the adaptors from the sequence reads by *cutadapt*. The *fqtrim* tool was used to perform base quality trimming (Phred score >30) by sliding window scan (6 nucleotides). The quality reads were then mapped to the mouse reference genome GRCm38 using *Hisat2* aligner (49). Read counting from the alignment data was performed by *FeatureCounts* (50).

### ***Mutual information network analysis***

The information theory (MI) approach (51) was used to infer gene expression networks. MI is a measure of the information content between two variables: a numerical value ranging from 0 to 1 depending on, intuitively, how much knowing one variable would predict the variability of the other. We calculated MIs in a pair-wise manner, both at gene and sample levels, to generate a weighted adjacency matrix by the Maximum Relevance Minimum Redundancy (MRMR) method (52). Then mutual information network analysis was performed using *minet* (53) followed by network visualization by *GGally*.

### **Statistical analysis**

All statistical tests were performed in *R*. Chi-Square analysis was performed to infer the significance of 2x2 contingency tests. Enrichment analysis was performed by Fisher exact tests followed by multiple corrections of *p*-values by False Discovery Rate (FDR). Comparison of variation between methylation and expression was based on beta-values of methylation (47) and fragment per kilobase per million (FPKM) values of expression (54). Distances calculation of methylation and expression variation was based on the



*Euclidean* method. Hierarchical clustering was performed from the distance measures by *ward.D2* as the method of agglomeration. Comparison between clusters (*tanglegram* analysis) was performed using the package *dendextend*. The canonical correlation analysis was performed by *cancor* function of *CCA* package. In this analysis, expression of epiclock genes in the GD15 placenta was treated as the independent variable (x-values), and the fetal brain was treated as the dependent variable (y-values). Correlation coefficients (coefficients of x and y values) were multiplied with the respective data matrices of fetal brain and placenta to generate covariates for comparison. The *neuralnet* package was used to train neural network (NN) models by backpropagation using the weight backtracking method (55). NN consists of three layers: input-layer that takes training data for model to learn, hidden-layer uses backpropagation to optimize the weights of the input variables to develop the model, output-layer uses the trained model to predicts the variable from a test data. The methylation data of the aging brain was used as predicted values, and those of fetal and postnatal brains were used as predictor values in NN modeling. The trained model was used to separately predict the methylation level in male and female aging brains. Finally, the observed and model-predicted methylation values of the aging brain in both sexes were compared to create confusion matrix using *caret* package to evaluate model accuracy.

## **Results**

### ***Epigenetic clock profiles of male and female brain***

DNA methylation of mouse epiclock was profiled in GD15, PND5, and WK70 male and female brains (**Supplementary Table 1**). The methylation data were used in epigenetic

age (also called DNA age) analysis (56) which showed that the female brain was biologically younger (29.6 weeks) than the male brain (38.1 weeks) despite the same chronological age of the animals. The female brain showed a higher level of methylation than the male brain for 854 sites, whereas the male brain showed higher methylation than the female brain for 1,028 sites (**Figure 1a**). A relatively lower level of epiclock methylation was observed in the fetal and postnatal brain compared to the aging brain (**Supplementary Figure 1**). Methylation level either increased or decreased in the brain among the three life stages (fetal, postnatal, and aging) in a sex-biased manner (**Figure 1b**). No significant bias was observed in a 2x2 contingency analysis of the number of sites that either increased or decreased in methylation level of male and female brain at fetal versus postnatal stage ( $P = 0.84$ ). But a significant ( $P < 0.0001$ ) difference was observed between postnatal and aging stage. Upon aging, a greater number of sites showed increased methylation in the brain of males than that of females (**Figure 1b**). Furthermore, specific epiclock genes were methylated in a sex-biased manner at all three life stages. A total of 245 epiclock sites showed increased methylation in the female brain than the male brain at each of the three stages (**Figure 1c**). An opposite pattern was observed with 187 sites (**Figure 1d**). The female bias methylations showed higher median beta-values (methylation level) compared to that of male bias methylation sites (**Figure 1d**). Moreover, the female bias methylations showed higher level of variation than that of male bias methylations, and this pattern was consistent among the fetal, postnatal, and aging stages.

### *Developmental methylations as predictors of aging brain*

We employed NN modeling to test if methylation changes of epiclock genes in the brain at developmental stages (fetal and postnatal) are predictors of methylation of the aging brain (**Figure 2**). The epiclock methylation of the brain at fetal and postnatal stages were used to train NN model to learn the corresponding changes in methylation of the aging brain separately in males and females. The model converged after 778 iterative steps (number of optimizations at an error rate of less than 5%) with an average error rate of 1.69 in the female brain (**Figure 2a**). In the male brain, the model converged with only 175 iterations with an average error of 1.15 (**Figure 2b**). This agrees with our observation that variation in epiclock methylation is relatively higher in the female brain than the male brain. The confusion matrix showing the number of true and false predictions relative to the observed data are shown in **Figure 2c and d**. It shows that the model identified 113 methylations in the brain that occurred in the developmental stages (fetal and postnatal stages) that were predictive of epiclock changes in the brain upon aging (**Supplementary Table 2**).

### ***Expression changes of epiclock genes in brain***

RNA-seq was performed to profile gene expression of the same brain samples used for methylation analysis. Methylation changes of the predictive markers identified from *neuralnet* analysis (listed in **Supplementary Table 2**) were compared with expression level of the cognate genes in the brain at the fetal, postnatal, and aging stages. The tanglegram in **Figure 3a** showed that methylation changes were more similar between fetal and postnatal brain than aging brain. But expression changes were more similar between postnatal and aging brain than the fetal brain. This pattern of yin and yang

between methylation and expression changes in the brain suggested that low methylation was associated with higher expression in the fetal brain, whereas increase in methylation was linked to lower expression of genes upon aging (**Figure 3b** and c).

Next, we compared expression changes of the epiclock genes in the brain relative to placenta (**Figure 4a**). The hierarchical clustering analysis showed that epiclock genes were expressed in fetal brain in a more similar manner with placenta than the postnatal and aging brain. However, genes unrelated to epiclock did not show this pattern (**Figure 4b**). In non-epiclock genes, expression of fetal brain grouped together with that of postnatal and aging brain, and gene expression of placenta was distinct. This suggested that epigenetic clock is coordinately expressed between placenta and fetal brain. To further test this idea, canonical correlation analysis (CCA) (57) was performed. CCA showed that covariates of expression (which is expression multiplied with the correlation coefficient) of epiclock genes in the fetal brain was positively correlated with that of placenta (**Supplementary Figure 2**). But this relationship was absent in the expression of non-epiclock genes. This supported our idea that epigenetic clock is active during pregnancy and is likely associated with the regulation of the brain-placental axis (36, 58).

### ***Placenta shows sex-bias methylation in concert with fetal brain***

Whole-genome bisulfite sequencing (WGBS) was performed to further analyze global methylation of placenta in a comparative manner with that of fetal brain in both sexes. WGBS (data available in GEO, accession# GSE157553) identified 15,269 and 17,028 CpGs that were methylated in female-bias (FB) and male-bias (MB) manner respectively in both fetal brain and placenta (**Figure 5a** and b). The genomic position and methylation

level of these sites are provided in **Supplementary Table 3**. A significant ( $P=0.0003$ ) bias was observed in the location of these methylations in genic versus intergenic regions in the genome (**Figure 5c**). While some genes harbored either FB or MB methylations, genes were also identified that harbored both FB and MB methylations (**Figure 5d**).

The sex-bias methylations in gene bodies were predominantly found in introns. They were roughly 11-fold more in number than those in exons (**Table 1**). The frequency of sex-bias methylations was low in the untranslated regions (UTRs). While we identified 630 FB and 587 MB methylations within *cis*-regulatory regions, we rarely found these methylations in the promoters and Refseq functional elements (59). Sex-bias methylations were more frequent in CpG shores than CpG islands (**Table 1**).

Additionally, sex-bias methylations were found within repeat elements, the majority of which were associated with different retrotransposons both within genic and intergenic regions. While, in general, methylations occurred at a higher level in repeat sequences than non-repeat sequences in the genome, the number of sex-bias methylations were significantly different genic versus intergenic repeats (**Figure 6**) indicating a role of heterochromatin methylation in sex-bias gene regulation between fetal brain and placenta (28, 60–62).

Functional annotation of genes harboring the sex-bias methylations was performed. The analysis showed significant enrichment of specific pathways (Fisher exact test,  $P < 9.05$ ) most of which were related to signaling (**Supplementary Table 4**). Genes with FB methylations were enriched with T cell activation, Huntington disease, FGF and Cadherin signaling pathways. Genes with MB methylations were enriched with pathways of axon

guidance mediated by netrin, histamine H1 receptor mediated signaling, thyrotropin-releasing hormone receptor signaling, and heterotrimeric G-protein signaling. Also, specific pathways were commonly enriched by genes harboring both FB and MB methylations (see **Supplementary Table 4**).

### ***Crosstalk between epiclock and signaling genes in fetal brain is maintained in aging brain***

We identified specific epiclock genes and signaling pathway genes (**Supplementary Table 5**) that were methylated in both placenta and fetal brain in a coordinated manner. Principal component analysis showed two distinct groups of methylations in these epiclock and signaling genes identified in both placenta and fetal brain (**Figure 7a**). Hierarchical cluster analysis showed specific epiclock genes (*Khdrbs2*, *Brinp2*, *Clvs2*, *Sfi1*, *Gas7*, *Rhot1*, *Bcas3*, *Ankrd24*, *Sox30*, *Trim7*, *Wnt3a*, and *Lrrc75a*) and gonadotropin-releasing hormone receptor (GnRHR) pathway genes (*Pbx1*, *Atf3*, *Rap1b*, *Fos*, *Grb2*, *Zeb1*, *Smad4*, *Cdc42*, and *Raf1*) were coordinately methylated in both placenta and fetal brain in a sex-dependent manner (**Figure 7b and c**). The sex-bias methylations of these genes are listed in **Supplementary Table 5**. Mutual information network analysis (51) of expression changes of these genes further showed that they interacted differentially in males compared to females (**Figure 8a and b**). Furthermore, the analysis showed that the expression of these genes in the placenta was mutually informative in the brain at fetal as well as postnatal and aging stages (**Figure 8c and d**). This suggested that crosstalk among the epiclock genes and GnRHR pathway genes in

the placenta is epigenetically maintained in the brain throughout life, but in a sex-bias manner.

## **Discussion**

The current study investigated the epigenetic aging of male and female brain of C57BL/6J mice. The male brain showed higher epigenetic age than that of female brain. As the chronological age was same (70 weeks), this suggested that the epigenetic aging of the brain is sexually dimorphic. Sexual dimorphisms of brain have been reported in diverse animals, including flies (63), birds (64), rodents and humans (65). Sex differences in brain aging is also known (66–70). Results from the current study in mice are consistent with earlier study in humans which showed that the female brain remains younger than the male brain in a persistent manner (12). Evolutionary studies suggest that natural selection may shape brain neoteny (youth), and such selective forces can vary within and between species (67, 71). Moreover, brain aging can vary at individual as well as population levels within species (72, 73). Such heterogeneity in brain aging have been well documented (74–76). This includes studies in mice that showed that the inbred mice strains are age differentially (77). In addition, influence of sex on aging has also been implicated (78).

DNA methylation changes in the brain throughout life (18, 79, 80). Our data showed that there are patterns how these changes in brain as mice age. We found that specific CpG were persistently methylated in a sex-bias manner in fetal, postnatal, and old age.

Epigenetic clock analysis (81) identified CpGs (n=275) that were methylated higher in females than males. In contrast, relatively fewer sites (n=187) were methylated higher in

males than females. The female bias methylations had a higher level of variation than male bias methylations in the brain at all stages (**Figure 1**) which supported earlier observation that persistent methylations were required in female brain to suppress genes associated with brain masculinization (82). We were further able to identify specific epiclock methylation and associated genes as early-life predictors of brain aging in females versus males.

Methylation impacted gene expression in the brain (**Figure 3**). Methylation level was lower in the brain at fetal and postnatal stages than old age. In contrast, expression level was higher in postnatal and old ages than in fetal stage. This contrasting pattern suggested that methylation likely suppressed epiclock gene expression in the brain starting after birth. An earlier study in humans has shown that the brain transcriptome undergoes a significant remodeling at the postnatal age (71). Additionally, we observed that epiclock expression of the fetal brain was more related to that of the placenta than that of the postnatal and aging brain. Genes not related to epiclock did not this pattern. Expression of those genes in the fetal brain was more related to postnatal and aging brain than the placenta. This suggested that epiclock genes are regulated between placenta and fetal brain in a manner that is distinct from all other genes active during pregnancy.

We performed whole-genome methylation analysis that showed large distinctions in DNA methylation between fetal brain and placenta. It was expected as tissue-specific variation in DNA methylation has been extensively reported from previous studies (83–85). While different tissues accumulate methylations differentially, concordance in DNA methylation between tissues are also known (86). Studies have shown concordance in



DNA methylation in mouse placenta and fetal brain in response to exposure to polychlorinated biphenyls (87) and prenatal stress (88), indicating possible epigenetic programming of fetal brain by the placenta. In the current study, we observed that both placenta and fetal brain were coordinately methylated specific CpG sites in a sex-bias manner (**Figure 5**). These methylations occurred in gene bodies more often than in intergenic regions, which may support earlier reports that gene body methylations play essential roles in placental functions (89, 90). We observed that the sex-bias methylations were higher in repeat elements including L1 retrotransposons, *Alu* repeats and short interspersed repeats (**Figure 6**) than methylation in non-repeat sequences further supporting that heterochromatin methylation may have common influence on reproduction (91) and brain development (17).

A key finding of this study was the evidence of crosstalk among epigenetic clock and GnRHR pathway genes in the placenta and fetal brain (**Supplementary Table 5**). Network analysis showed evidence for placental links to brain that is maintained in the brain at postnatal and the aging stage. GnRH plays key roles in mammalian reproduction by inducing luteinizing hormone (LH), and follicle-stimulating hormone (FSH). It also functions in DNA modification that is required to express the target genes in gonadotrope (92). Besides a role in the anterior pituitary, GnRH also plays important roles in the placenta, likely to modulate the maternal-fetal interface (93). In mice, gonadotropin production varies in a sex-dependent manner during late gestation, in which fetal androgen plays a critical regulatory function (94). Regulation of GnRH is suppressed by androgen in males, which plays roles in brain masculinization (95). Suppression of genes

associated with brain masculinization is mediated by DNA methylation in the brain of females (82). Multiple studies have shown that exposure to sex hormone at the fetal stage plays a leading role in sex-specific fetal programming of cellular metabolism that poses a differential risk to metabolic diseases later in life (96, 97), including a metabolic decline of the brain (98).

In conclusion, the current study shows that epigenetic aging of brain is sex-bias, and further suggests that this bias is linked to the placenta as evident from DNA methylation of placenta relative to the brain of male versus female fetuses. The results support DevAge theory (1) that early-life developmental processes have epigenetic links to aging processes. It further highlights that aging is a biological process that originates from the fetal stage and persists throughout the life.

### **Acknowledgments**

The authors are thankful to Dr. Pramod Dhakal for assisting fetal brain dissections.

Nathan J. Bivens, Mingyi Zhou, and Christopher Bottoms of Genomics Technology Core provided help in library preparation, sequencing, and raw data processing.

### **References**

1. Dilman, V. M. (1971) Age-associated elevation of hypothalamic, threshold to feedback control, and its role in development, ageing, and disease. *Lancet* **1**, 1211–1219
2. Feltes, B. C., de Faria Poloni, J., and Bonatto, D. (2015) Development and aging: two opposite but complementary phenomena. *Interdiscip Top Gerontol* **40**, 74–84
3. de Magalhães, J. P. and Church, G. M. (2005) Genomes optimize reproduction: aging as a consequence of the developmental program. *Physiology (Bethesda)* **20**, 252–259
4. Aguilaniu, H. (2015) The mysterious relationship between reproduction and longevity. *Worm* **4**, e1020276

5. Bianco-Miotto, T., Craig, J. M., Gasser, Y. P., van Dijk, S. J., and Ozanne, S. E. (2017) Epigenetics and DOHaD: from basics to birth and beyond. *J Dev Orig Health Dis* **8**, 513–519
6. Vaiserman, A., ed. (2019) Early Life Origins of Ageing and Longevity. Springer International Publishing
7. Fushan, A. A., Turanov, A. A., Lee, S.-G., Kim, E. B., Lobanov, A. V., Yim, S. H., Buffenstein, R., Lee, S.-R., Chang, K.-T., Rhee, H., Kim, J.-S., Yang, K.-S., and Gladyshev, V. N. (2015) Gene expression defines natural changes in mammalian lifespan. *Aging Cell* **14**, 352–365
8. Barker, D. J. P., Osmond, C., Thornburg, K. L., Kajantie, E., and Eriksson, J. G. (2011) The lifespan of men and the shape of their placental surface at birth. *Placenta* **32**, 783–787
9. Müller, H.-G., Chiou, J.-M., Carey, J. R., and Wang, J.-L. (2002) Fertility and Life Span Late Children Enhance Female Longevity. *J Gerontol A Biol Sci Med Sci* **57**, B202–B206
10. Austad, S. N. and Fischer, K. E. (2016) Sex Differences in Lifespan. *Cell Metab* **23**, 1022–1033
11. Schaum, N., Lehallier, B., Hahn, O., Pálovics, R., Hosseinzadeh, S., Lee, S. E., Sit, R., Lee, D. P., Losada, P. M., Zardeneta, M. E., Fehlmann, T., Webber, J. T., McGeever, A., Calcuttawala, K., Zhang, H., Berdnik, D., Mathur, V., Tan, W., Zee, A., Tan, M., Tabula Muris Consortium, Pisco, A. O., Karkanas, J., Neff, N. F., Keller, A., Darmanis, S., Quake, S. R., and Wyss-Coray, T. (2020) Ageing hallmarks exhibit organ-specific temporal signatures. *Nature* **583**, 596–602
12. Goyal, M. S., Blazey, T. M., Su, Y., Couture, L. E., Durbin, T. J., Bateman, R. J., Benzinger, T. L.-S., Morris, J. C., Raichle, M. E., and Vlassenko, A. G. (2019) Persistent metabolic youth in the aging female brain. *Proc. Natl. Acad. Sci. U.S.A.* **116**, 3251–3255
13. Armstrong, N. M., An, Y., Beason-Held, L., Doshi, J., Erus, G., Ferrucci, L., Davatzikos, C., and Resnick, S. M. (2019) Sex differences in brain aging and predictors of neurodegeneration in cognitively healthy older adults. *Neurobiol. Aging* **81**, 146–156
14. Johnson, A. A., Akman, K., Calimport, S. R. G., Wuttke, D., Stolzing, A., and de Magalhães, J. P. (2012) The Role of DNA Methylation in Aging, Rejuvenation, and Age-Related Disease. *Rejuvenation Res* **15**, 483–494
15. Jones, M. J., Goodman, S. J., and Kobor, M. S. (2015) DNA methylation and healthy human aging. *Aging Cell* **14**, 924–932
16. Sierra, M. I., Fernández, A. F., and Fraga, M. F. (2015) Epigenetics of Aging. *Curr Genomics* **16**, 435–440
17. Rath, P. C. and Kanungo, M. S. (1989) Methylation of repetitive DNA sequences in the brain during aging of the rat. *FEBS Lett* **244**, 193–198
18. Numata, S., Ye, T., Hyde, T. M., Guitart-Navarro, X., Tao, R., Wininger, M., Colantuoni, C., Weinberger, D. R., Kleinman, J. E., and Lipska, B. K. (2012) DNA Methylation Signatures in Development and Aging of the Human Prefrontal Cortex. *Am J Hum Genet* **90**, 260–272

19. Farré, P., Jones, M. J., Meaney, M. J., Emberly, E., Turecki, G., and Kobor, M. S. (2015) Concordant and discordant DNA methylation signatures of aging in human blood and brain. *Epigenetics Chromatin* **8**, 19
20. Pidsley, R., Viana, J., Hannon, E., Spiers, H., Troakes, C., Al-Saraj, S., Mechawar, N., Turecki, G., Schalkwyk, L. C., Bray, N. J., and Mill, J. (2014) Methylomic profiling of human brain tissue supports a neurodevelopmental origin for schizophrenia. *Genome Biol* **15**, 483
21. Rachdaoui, N. and Sarkar, D. K. (2014) Transgenerational epigenetics and brain disorders. *Int Rev Neurobiol* **115**, 51–73
22. Tamnes, C. K., Walhovd, K. B., Dale, A. M., Østby, Y., Grydeland, H., Richardson, G., Westlye, L. T., Roddey, J. C., Hagler, D. J., Due-Tønnessen, P., Holland, D., Fjell, A. M., and Alzheimer’s Disease Neuroimaging Initiative. (2013) Brain development and aging: overlapping and unique patterns of change. *Neuroimage* **68**, 63–74
23. Niculescu, M. D., Craciunescu, C. N., and Zeisel, S. H. (2006) Dietary choline deficiency alters global and gene-specific DNA methylation in the developing hippocampus of mouse fetal brains. *FASEB J* **20**, 43–49
24. Hirabayashi, K., Shiota, K., and Yagi, S. (2013) DNA methylation profile dynamics of tissue-dependent and differentially methylated regions during mouse brain development. *BMC Genomics* **14**, 82
25. Kim, H., Jang, W. Y., Kang, M.-C., Jeong, J., Choi, M., Sung, Y., Park, S., Kwon, W., Jang, S., Kim, M. O., Kim, S. H., and Ryoo, Z. Y. (2016) TET1 contributes to neurogenesis onset time during fetal brain development in mice. *Biochem Biophys Res Commun* **471**, 437–443
26. Alberry, B. L. J. and Singh, S. M. (2020) Hippocampal DNA Methylation in a Mouse Model of Fetal Alcohol Spectrum Disorder That Includes Maternal Separation Stress Only Partially Explains Changes in Gene Expression. *Front Genet* **11**, 70
27. Ratnu, V. S., Emami, M. R., and Bredy, T. W. (2017) Genetic and epigenetic factors underlying sex differences in the regulation of gene expression in the brain. *J Neurosci Res* **95**, 301–310
28. Spiers, H., Hannon, E., Schalkwyk, L. C., Smith, R., Wong, C. C. Y., O’Donovan, M. C., Bray, N. J., and Mill, J. (2015) Methylomic trajectories across human fetal brain development. *Genome Res* **25**, 338–352
29. Cortes, L. R., Cisternas, C. D., and Forger, N. G. (2019) Does Gender Leave an Epigenetic Imprint on the Brain? *Front. Neurosci.* **13**
30. Koukoura, O., Sifakis, S., and Spandidos, D. A. (2012) DNA methylation in the human placenta and fetal growth (review). *Mol Med Rep* **5**, 883–889
31. Jansson, T. and Powell, T. L. (2013) Role of placental nutrient sensing in developmental programming. *Clin Obstet Gynecol* **56**, 591–601
32. Denisova, E. I., Kozhevnikova, V. V., Bazhan, N. M., and Makarova, E. N. (2020) Sex-specific effects of leptin administration to pregnant mice on the placentae and the metabolic phenotypes of offspring. *FEBS Open Bio* **10**, 96–106
33. Kratimenos, P. and Penn, A. A. (2019) Placental programming of neuropsychiatric disease. *Pediatr. Res.* **86**, 157–164

34. Bronson, S. L. and Bale, T. L. (2016) The Placenta as a Mediator of Stress Effects on Neurodevelopmental Reprogramming. *Neuropsychopharmacology* **41**, 207–218
35. Behura, S. K., Dhakal, P., Kelleher, A. M., Balboula, A., Patterson, A., and Spencer, T. E. (2019) The brain-placental axis: Therapeutic and pharmacological relevancy to pregnancy. *Pharmacol. Res.* **149**, 104468
36. Behura, S. K., Kelleher, A. M., and Spencer, T. E. (2019) Evidence for functional interactions between the placenta and brain in pregnant mice. *FASEB J.* **33**, 4261–4272
37. Dhakal, P., Strawn, M., Samal, A., and Behura, S. K. (2021) Fetal Brain Elicits Sexually Conflicting Transcriptional Response to the Ablation of Uterine Forkhead Box A2 (Foxa2) in Mice. *International Journal of Molecular Sciences* **22**, 9693
38. Strawn, M., Moraes, J. G. N., Safranski, T. J., and Behura, S. K. (2021) Sexually Dimorphic Transcriptomic Changes of Developing Fetal Brain Reveal Signaling Pathways and Marker Genes of Brain Cells in Domestic Pigs. *Cells* **10**, 2439
39. Dhakal, P. and Soares, M. J. (2017) Single-step PCR-based genetic sex determination of rat tissues and cells. *BioTechniques* **62**, 232–233
40. Chew, Y. C., Guo, W., Yang, X., Jin, M., Booher, K., Horvath, S., and Jia, X. Y. (2018) A High-throughput Targeted Bisulfite Sequencing-based Analysis for Epigenetic Age Quantification and Monitoring. *The FASEB Journal* **32**, 674.8-674.8
41. Krueger, F. and Andrews, S. R. (2011) Bismark: a flexible aligner and methylation caller for Bisulfite-Seq applications. *Bioinformatics* **27**, 1571–1572
42. Coninx, E., Chew, Y. C., Yang, X., Guo, W., Coolkens, A., Baatout, S., Moons, L., Verslegers, M., and Quintens, R. (2020) Hippocampal and cortical tissue-specific epigenetic clocks indicate an increased epigenetic age in a mouse model for Alzheimer's disease. *Aging (Albany NY)* **12**, 20817–20834
43. Docherty, S. J., Davis, O. S., Haworth, C. M., Plomin, R., and Mill, J. (2009) Bisulfite-based epityping on pooled genomic DNA provides an accurate estimate of average group DNA methylation. *Epigenetics & Chromatin* **2**, 3
44. Langmead, B. and Salzberg, S. L. (2012) Fast gapped-read alignment with Bowtie 2. *Nat. Methods* **9**, 357–359
45. Moore, L. D., Le, T., and Fan, G. (2013) DNA Methylation and Its Basic Function. *Neuropsychopharmacology* **38**, 23–38
46. Chen, Y., Pal, B., Visvader, J. E., and Smyth, G. K. (2018) Differential methylation analysis of reduced representation bisulfite sequencing experiments using edgeR. *F1000Res* **6**
47. Du, P., Zhang, X., Huang, C.-C., Jafari, N., Kibbe, W. A., Hou, L., and Lin, S. M. (2010) Comparison of Beta-value and M-value methods for quantifying methylation levels by microarray analysis. *BMC Bioinformatics* **11**, 587
48. Quinlan, A. R. and Hall, I. M. (2010) BEDTools: a flexible suite of utilities for comparing genomic features. *Bioinformatics* **26**, 841–842
49. Kim, D., Langmead, B., and Salzberg, S. L. (2015) HISAT: a fast spliced aligner with low memory requirements. *Nat. Methods* **12**, 357–360
50. Liao, Y., Smyth, G. K., and Shi, W. (2014) featureCounts: an efficient general purpose program for assigning sequence reads to genomic features. *Bioinformatics* **30**, 923–930

51. Steuer, R., Kurths, J., Daub, C. O., Weise, J., and Selbig, J. (2002) The mutual information: detecting and evaluating dependencies between variables. *Bioinformatics* **18 Suppl 2**, S231-240
52. Radovic, M., Ghalwash, M., Filipovic, N., and Obradovic, Z. (2017) Minimum redundancy maximum relevance feature selection approach for temporal gene expression data. *BMC Bioinformatics* **18**
53. Meyer, P. E., Lafitte, F., and Bontempi, G. (2008) minet: A R/Bioconductor package for inferring large transcriptional networks using mutual information. *BMC bioinformatics* **9**, 461
54. Mortazavi, A., Williams, B. A., McCue, K., Schaeffer, L., and Wold, B. (2008) Mapping and quantifying mammalian transcriptomes by RNA-Seq. *Nat Methods* **5**, 621–628
55. Riedmiller, M. (1994) Advanced Supervised Learning in Multi-layer Perceptrons - From Backpropagation to Adaptive Learning Algorithms.
56. Handl, L., Jalali, A., Scherer, M., Eggeling, R., and Pfeifer, N. (2019) Weighted elastic net for unsupervised domain adaptation with application to age prediction from DNA methylation data. *Bioinformatics (Oxford, England)* **35**, i154–i163
57. Zhuang, X., Yang, Z., and Cordes, D. (2020) A technical review of canonical correlation analysis for neuroscience applications. *Hum Brain Mapp* **41**, 3807–3833
58. Behura, S. K., Dhakal, P., Kelleher, A. M., Balboula, A., Patterson, A., and Spencer, T. E. (2019) The brain-placental axis: Therapeutic and pharmacological relevancy to pregnancy. *Pharmacol. Res.* **149**, 104468
59. Farrell, C. M., Goldfarb, T., Rangwala, S. H., Astashyn, A., Ermolaeva, O. D., Hem, V., Katz, K. S., Kodali, V. K., Ludwig, F., Wallin, C. L., Pruitt, K. D., and Murphy, T. D. (2022) RefSeq Functional Elements as experimentally assayed nongenic reference standards and functional interactions in human and mouse. *Genome Res* **32**, 175–188
60. Decato, B. E., Lopez-Tello, J., Sferruzzi-Perri, A. N., Smith, A. D., and Dean, M. D. (2017) DNA Methylation Divergence and Tissue Specialization in the Developing Mouse Placenta. *Molecular Biology and Evolution* **34**, 1702–1712
61. Brown, J. D., Piccuillo, V., and O’Neill, R. J. (2012) Retroelement demethylation associated with abnormal placentation in *Mus musculus* x *Mus caroli* hybrids. *Biol Reprod* **86**, 88
62. Chatterjee, A., Macaulay, E. C., Rodger, E. J., Stockwell, P. A., Parry, M. F., Roberts, H. E., Slatter, T. L., Hung, N. A., Devenish, C. J., and Morison, I. M. (2016) Placental Hypomethylation Is More Pronounced in Genomic Loci Devoid of Retroelements. *G3 (Bethesda)* **6**, 1911–1921
63. Cachero, S., Ostrovsky, A. D., Yu, J. Y., Dickson, B. J., and Jefferis, G. S. X. E. (2010) Sexual Dimorphism in the Fly Brain. *Curr Biol* **20**, 1589–1601
64. Hutchison, J. B., Beyers, C., Hutchison, R. E., and Wozniak, A. (1995) Sexual dimorphism in the developmental regulation of brain aromatase. *J Steroid Biochem Mol Biol* **53**, 307–313
65. Gorski, R. A. (1985) Sexual dimorphisms of the brain. *J Anim Sci* **61 Suppl 3**, 38–61



66. Guebel, D. V. and Torres, N. V. (2016) Sexual Dimorphism and Aging in the Human Hippocampus: Identification, Validation, and Impact of Differentially Expressed Genes by Factorial Microarray and Network Analysis. *Front Aging Neurosci* **8**, 229
67. Rothwell, E. S., Workman, K. P., Wang, D., and Lacreuse, A. (2022) Sex differences in cognitive aging: a 4-year longitudinal study in marmosets. *Neurobiology of Aging* **109**, 88–99
68. Costantino, S. and Paneni, F. (2020) Sex-related differences in the ageing brain: time for precision medicine? *Cardiovasc Res* **116**, 1246–1248
69. Armstrong, N. M., An, Y., Beason-Held, L., Doshi, J., Erus, G., Ferrucci, L., Davatzikos, C., and Resnick, S. M. (2019) Sex differences in brain aging and predictors of neurodegeneration in cognitively healthy older adults. *Neurobiol Aging* **81**, 146–156
70. Coffey, C. E., Lucke, J. F., Saxton, J. A., Ratcliff, G., Uritas, L. J., Billig, B., and Bryan, R. N. (1998) Sex differences in brain aging: a quantitative magnetic resonance imaging study. *Arch Neurol* **55**, 169–179
71. Somel, M., Franz, H., Yan, Z., Lorenc, A., Guo, S., Giger, T., Kelso, J., Nickel, B., Dannemann, M., Bahn, S., Webster, M. J., Weickert, C. S., Lachmann, M., Pääbo, S., and Khaitovich, P. (2009) Transcriptional neoteny in the human brain. *PNAS* **106**, 5743–5748
72. Vidal-Pineiro, D., Wang, Y., Krogsrud, S. K., Amlien, I. K., Baaré, W. F., Bartres-Faz, D., Bertram, L., Brandmaier, A. M., Drevon, C. A., Düzel, S., Ebmeier, K., Henson, R. N., Junqué, C., Kievit, R. A., Kühn, S., Leonardsen, E., Lindenberger, U., Madsen, K. S., Magnussen, F., Mowinckel, A. M., Nyberg, L., Roe, J. M., Segura, B., Smith, S. M., Sørensen, Ø., Suri, S., Westerhausen, R., Zalesky, A., Zsoldos, E., Walhovd, K. B., and Fjell, A. (2021) Individual variations in ‘brain age’ relate to early-life factors more than to longitudinal brain change. *eLife* **10**, e69995
73. Kverková, K., Polonyiová, A., Kubička, L., and Němec, P. (2020) Individual and age-related variation of cellular brain composition in a squamate reptile. *Biol Lett* **16**, 20200280
74. Brewster, P., Barnes, L., Haan, M., Johnson, J. K., Manly, J. J., Nápoles, A. M., Whitmer, R. A., Carvajal-Carmona, L., Early, D., Farias, S., Mayeda, E. R., Melrose, R., Meyer, O. L., Zeki Al Hazzouri, A., Hinton, L., and Mungas, D. (2019) Progress and future challenges in aging and diversity research in the United States. *Alzheimers Dement* **15**, 995–1003
75. Grinberg, L. T., Ferretti, R. E. de L., Farfel, J. M., Leite, R., Pasqualucci, C. A., Rosemberg, S., Nitrini, R., Saldiva, P. H. N., Filho, W. J., and Brazilian Aging Brain Study Group. (2007) Brain bank of the Brazilian aging brain study group - a milestone reached and more than 1,600 collected brains. *Cell Tissue Bank* **8**, 151–162
76. Sonnen, J. A., Santa Cruz, K., Hemmy, L. S., Woltjer, R., Leverenz, J. B., Montine, K. S., Jack, C. R., Kaye, J., Lim, K., Larson, E. B., White, L., and Montine, T. J. (2011) Ecology of the aging human brain. *Arch Neurol* **68**, 1049–1056

77. Yuan, R., Tsaih, S.-W., Petkova, S. B., de Evsikova, C. M., Xing, S., Marion, M. A., Bogue, M. A., Mills, K. D., Peters, L. L., Bult, C. J., Rosen, C. J., Sundberg, J. P., Harrison, D. E., Churchill, G. A., and Paigen, B. (2009) Aging in inbred strains of mice: study design and interim report on median lifespans and circulating IGF1 levels. *Aging Cell* **8**, 277–287
78. Mitchell, S. J., Matute, J. M., Scheibye-Knudsen, M., Fang, E., Aon, M., González-Reyes, J. A., Cortassa, S., Kaushik, S., Gonzalez-Freire, M., Patel, B., Wahl, D., Ali, A., Calvo-Rubio, M., Burón, M. I., Guterrez, V., Ward, T. M., Palacios, H. H., Cai, H., Frederick, D. W., Hine, C., Broeskamp, F., Habering, L., Dawson, J., Beasley, T. M., Wan, J., Ikeno, Y., Hubbard, G., Becker, K. G., Zhang, Y., Bohr, V., Longo, D. L., Navas, P., Ferrucci, L., Sinclair, D. A., Cohen, P., Egan, J. M., Mitchell, J. R., Baur, J. A., Allison, D. B., Anson, R. M., Villalba, J. M., Madeo, F., Cuervo, A. M., Pearson, K. J., Ingram, D. K., Bernier, M., and de Cabo, R. (2016) Effects of Sex, Strain, and Energy Intake on Hallmarks of Aging in Mice. *Cell Metab* **23**, 1093–1112
79. Li, L., Maire, C. L., Bilenky, M., Carles, A., Heravi-Moussavi, A., Hong, C., Tam, A., Kamoh, B., Cho, S., Cheung, D., Li, I., Wong, T., Nagarajan, R. P., Mungall, A. J., Moore, R., Wang, T., Kleinman, C. L., Jado, N., Jones, S. J., Marra, M. A., Ligon, K. L., Costello, J. F., and Hirst, M. (2020) Epigenomic programming in early fetal brain development. *Epigenomics* **12**, 1053–1070
80. Tognini, P., Napoli, D., and Pizzorusso, T. (2015) Dynamic DNA methylation in the brain: a new epigenetic mark for experience-dependent plasticity. *Front Cell Neurosci* **9**, 331
81. Stubbs, T. M., Bonder, M. J., Stark, A.-K., Krueger, F., BI Ageing Clock Team, von Meyenn, F., Stegle, O., and Reik, W. (2017) Multi-tissue DNA methylation age predictor in mouse. *Genome Biol.* **18**, 68
82. Nugent, B. M., Wright, C. L., Shetty, A. C., Hodes, G. E., Lenz, K. M., Mahurkar, A., Russo, S. J., Devine, S. E., and McCarthy, M. M. (2015) Brain feminization requires active repression of masculinization via DNA methylation. *Nat Neurosci* **18**, 690–697
83. Stubbs, T. M., Bonder, M. J., Stark, A.-K., Krueger, F., BI Ageing Clock Team, von Meyenn, F., Stegle, O., and Reik, W. (2017) Multi-tissue DNA methylation age predictor in mouse. *Genome Biol.* **18**, 68
84. Horvath, S. (2013) DNA methylation age of human tissues and cell types. *Genome Biol.* **14**, R115
85. Teschendorff, A. E., Zhu, T., Breeze, C. E., and Beck, S. (2020) EPISCORE: cell type deconvolution of bulk tissue DNA methylomes from single-cell RNA-Seq data. *Genome Biol* **21**, 221
86. Hannon, E., Mansell, G., Walker, E., Nabais, M. F., Burrage, J., Kepa, A., Best-Lane, J., Rose, A., Heck, S., Moffitt, T. E., Caspi, A., Arseneault, L., and Mill, J. (2021) Assessing the co-variability of DNA methylation across peripheral cells and tissues: Implications for the interpretation of findings in epigenetic epidemiology. *PLOS Genetics* **17**, e1009443
87. Laufer, B. I., Neier, K. E., Valenzuela, A. E., Yasui, D. H., Schmidt, R. J., Lein, P. J., and LaSalle, J. M. (2021) Genome-Wide DNA Methylation Profiles of



- Neurodevelopmental Disorder Genes in Mouse Placenta and Fetal Brain Following Prenatal Exposure to Polychlorinated Biphenyls. *bioRxiv* 2021.05.27.446011
88. Jensen Peña, C., Monk, C., and Champagne, F. A. (2012) Epigenetic effects of prenatal stress on 11 $\beta$ -hydroxysteroid dehydrogenase-2 in the placenta and fetal brain. *PLoS One* **7**, e39791
  89. Lim, Y. C., Li, J., Ni, Y., Liang, Q., Zhang, J., Yeo, G. S. H., Lyu, J., Jin, S., and Ding, C. (2017) A complex association between DNA methylation and gene expression in human placenta at first and third trimesters. *PLoS One* **12**, e0181155
  90. Schroeder, D. I., Jayashankar, K., Douglas, K. C., Thirkill, T. L., York, D., Dickinson, P. J., Williams, L. E., Samollow, P. B., Ross, P. J., Bannasch, D. L., Douglas, G. C., and LaSalle, J. M. (2015) Early Developmental and Evolutionary Origins of Gene Body DNA Methylation Patterns in Mammalian Placentas. *PLoS Genet* **11**, e1005442
  91. Gruzieva, O., Merid, S. K., Chen, S., Mukherjee, N., Hedman, A. M., Almqvist, C., Andolf, E., Jiang, Y., Kere, J., Scheynius, A., Söderhäll, C., Ullemar, V., Karmaus, W., Melén, E., Arshad, S. H., and Pershagen, G. (2019) DNA Methylation Trajectories During Pregnancy. *Epigenet Insights* **12**, 2516865719867090
  92. Melamed, P., Haj, M., Yosefzon, Y., Rudnizky, S., Wijeweera, A., Pnueli, L., and Kaplan, A. (2018) Multifaceted Targeting of the Chromatin Mediates Gonadotropin-Releasing Hormone Effects on Gene Expression in the Gonadotrope. *Frontiers in Endocrinology* **9**
  93. Sasaki, K. and Norwitz, E. R. (2011) Gonadotropin-releasing hormone/gonadotropin-releasing hormone receptor signaling in the placenta. *Curr Opin Endocrinol Diabetes Obes* **18**, 401–408
  94. Kreisman, M. J., Song, C. I., Yip, K., Natale, B. V., Natale, D. R., and Breen, K. M. (2017) Androgens Mediate Sex-Dependent Gonadotropin Expression During Late Prenatal Development in the Mouse. *Endocrinology* **158**, 2884–2894
  95. Zuloaga, D. G., Puts, D. A., Jordan, C. L., and Breedlove, S. M. (2008) The Role of Androgen Receptors in the Masculinization of Brain and Behavior: What we've learned from the Testicular Feminization Mutation. *Horm Behav* **53**, 613–626
  96. Hägg, S. and Jylhävä, J. (2021) Sex differences in biological aging with a focus on human studies. *eLife* **10**, e63425
  97. Dearden, L., Bouret, S. G., and Ozanne, S. E. (2018) Sex and gender differences in developmental programming of metabolism. *Mol Metab* **15**, 8–19
  98. Goyal, M. S., Blazey, T. M., Su, Y., Couture, L. E., Durbin, T. J., Bateman, R. J., Benzinger, T. L.-S., Morris, J. C., Raichle, M. E., and Vlassenko, A. G. (2019) Persistent metabolic youth in the aging female brain. *PNAS* **116**, 3251–3255

## Figure Legends

### Figure 1. Epigenetic clock analysis of aged and developing brain in male and female

**mice. A.** Epigenetic age, based on the methylation status of the epigenetic clock, of the male and female brain of 70 weeks old mice. The Venn diagram shows the number of

epiclock sites with higher methylation in females than males, or *vice versa*. The intersection shows the number of sites that had the same level of methylation in the brain in both sexes. **B.** Comparison of methylation of epiclock in the male and female brain at fetal stage (GD15) and postnatal stage (PND5) with the aged stage (WK70). The number and direction of arrows show a higher level of methylation of epiclock sites between stages (arrowhead shows the stage where methylation is higher). 2x2 contingency test shows no significant bias in the number of CpGs with increase or decrease methylation during brain development (GD15 vs. PND5) but significant bias between PND5 and WK70. **C.** Number of epiclock sites showing consistently either female bias or male bias methylation in the brain among all three life stages (fetal, postnatal, and aging). **D.** Boxplot shows the female-bias epiclock methylation in the brain among the three life stages. The median methylation is shown by horizontal lines inside the boxes. **E.** Boxplot shows the male-bias epiclock methylation among the three life stages. The median methylation is also shown by horizontal lines inside the boxes.

**Figure 2. NN modeling of the epigenetic clock variation.** **A.** Epigenetic clock with female-bias methylation data was used to train NN model. **B.** The epigenetic clock with male-bias methylation data was used to train NN model. The trained models were then used for predictions of methylation of aging brain. The confusion matrix shows the number of true and false predictions relative to the observed methylation data (**C** and **D**).

**Figure 3. Comparison of methylation and expression variation of epiclock prediction maker genes.** **A.** Tanglegram shows comparison of methylation and expression patterns of the epiclock predictive genes (from NN models) among the fetal,

postnatal, and aging brains of both sexes. **B.** Heatmap of methylation variation of epiclock marker genes. **C.** Heatmap of expression variation of epiclock marker genes.

**Figure 4. Comparison of placenta and brain gene expression.** **A.** Heatmap of expression of all epiclock genes in placenta along with the fetal brain, postnatal brain, and aging brain. **B.** Heatmap of expression of non-epiclock genes in placenta and fetal brain, postnatal brain, and aging brain. In both plots, the scales on the top left show the color codes for methylation levels.

**Figure 5. Common sex-bias methylation in the placenta and fetal brain.** **A.** Boxplot showing that specific sites are methylated in a female-bias (FB) manner in both placenta and fetal brain. Y-axis shows beta-values of methylation. X-axis shows brain (BR) and placenta (PL) of both sexes (M= male and F=female). **B.** Boxplot showing that specific sites are methylated in a male-bias (MB) manner in both placenta and fetal brain. Y-axis shows beta-values of methylation. X-axis shows brain (BR) and placenta (PL) of both sexes (M= male and F=female). **C.** Barplot showing the number of methylations that were either female-bias or male-bias methylations within genes or in intergenic regions. The 2x2 contingency test  $p$ -value of association (sex vs. location) is shown. **D.** Venn diagram showing the number of genes with either male-bias or female-bias methylation or both male- as well as female-bias methylations. The cartoons show the location of male and female bias methylations in those genes for illustrative purpose.

**Figure 6. Methylation of repeat elements in the placenta and fetal brain.** **A.** A schematic representation of methylation of repeat elements either in genic or intergenic regions. **B.** Barplot showing the number of all methylations (sex-bias or not) in different

repeat elements. Top-most abundant repeats (based on number of methylation) are shown. **C.** Number of sex bias methylations observed in both placenta and fetal brain are differentially associated (significance level shown) with repeat elements within genic and intergenic regions. **D.** Comparison of methylation level of epiclock sites within repeat elements among fetal, postnatal, and aged brain. **E.** Comparison of the methylation level of epiclock sites found within non-repeat elements among fetal, postnatal, and aged brain.

**Figure 7. Sex-bias methylation changes among epiclock and signaling genes in the brain.** **A.** Principal component analysis of male (M) and female (F) bias changes in methylation of epiclock and signaling genes in the brain among the fetal, postnatal, and aging stages. The color codes are according to the association (types) of the methylations with genes and sex listed in the legend right to the plot. **B.** Circular dendrogram based on hierarchical cluster analysis of female-bias methylations. The leaf color in the dendrogram matches to color code description in **A.** The branch color of the two clusters is shown in red and green. **C.** Circular dendrogram based on hierarchical cluster analysis of male-bias methylations. The leaf color in the dendrogram matches to color code description in **A.** The branch color of the two clusters is shown in red and green.

**Figure 8. Crosstalk among epiclock and signaling genes.** Expression network among epiclock and signaling genes associated with female-bias (**A**) and male-bias methylations (**B**). Color codes represent gene types shown in the plots. **C.** Circos plot showing placental links with brain in females. **D.** Circos plot showing placental links with brain in males. The arches in both **C** and **D** represent the information contents mutually shared between the placenta and brain (shown on the circumference of the plots).

## **Supplementary Figure legends**

**Supplementary Figure 1.** Heatmap showing variation in methylation of epigenetic clock in the brain of males and females at GD15, PND5, and WK70. The scale on the top left shows the color codes for methylation levels.

**Supplementary Figure 2.** Scatter plots showing the relationship between covariates (of two major axes x and y calculated from the canonical correlation analysis) of methylation changes in placenta relative to the fetal brain of both sexes. The pattern for epiclock genes is shown in **A**, and for all other genes is shown in **B**.

## **Supplementary Table List**

**Supplementary Table 1.** Methylation level (beta-value) of mouse epigenetic clock in fetal (GD15), postnatal (PND5), and aging (WK70) brain of female and male mice. Associated genes are also shown.

**Supplementary Table 2.** List of early-life methylation marks that are predictive of brain aging in males and females.

**Supplementary Table 3.** List of CpG sites showing sex-bias methylation in both placenta and fetal brain. The methylation level in the placenta and fetal brain are shown. Genes associated with methylations are also listed.

**Supplementary Table 4.** Significant enrichment of specific pathways by genes with either male- or female-bias methylations in the placenta and fetal brain.

**Supplementary Table 5.** List of methylations in epiclock and signaling genes that show differential crosstalk in males versus females. The epiclock genes that were identified as predictive markers of brain aging and the genes associated with the GnRHR pathway are indicated.

**Table 1.** Number of FB and MB methylations in fetal brain and placenta in different genic and intergenic features of the genome.

| <b>Feature</b>            | <b>FB</b> | <b>MB</b> |
|---------------------------|-----------|-----------|
| Exon                      | 662       | 730       |
| Intron                    | 7594      | 8141      |
| UTRs                      | 298       | 331       |
| Promoter                  | 3         | 4         |
| CpG island                | 1         | 3         |
| CpG shore                 | 165       | 175       |
| Refseq Functional Element | 14        | 20        |

**A**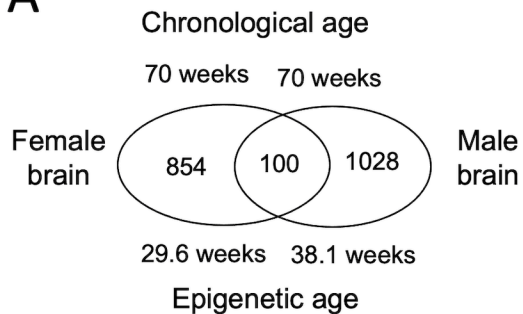**B**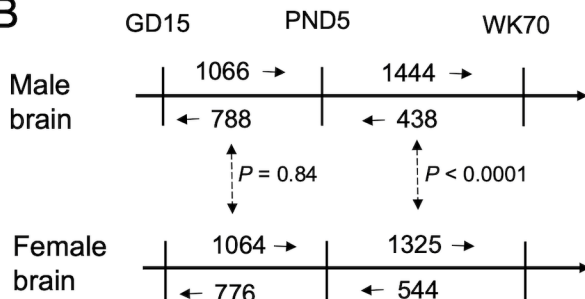**C**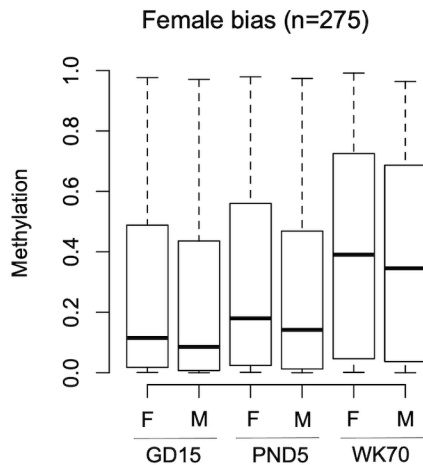**D**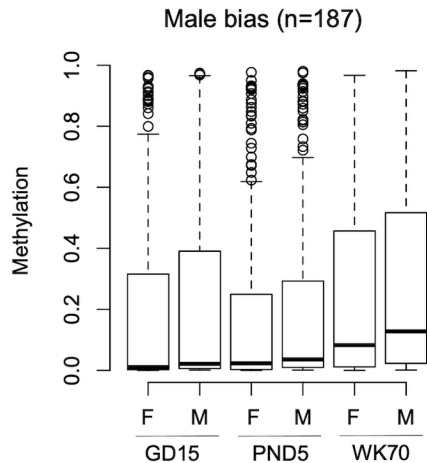



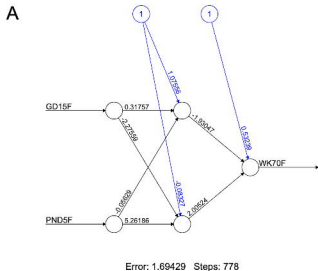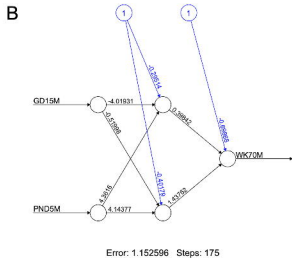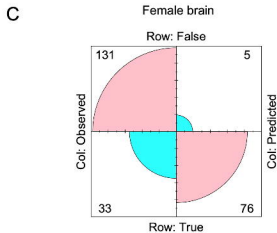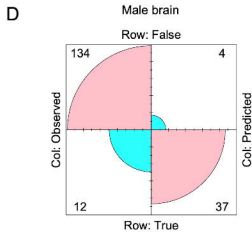

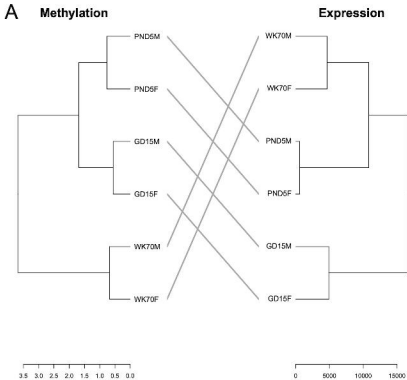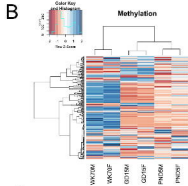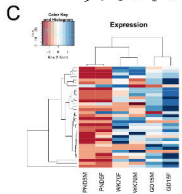

A

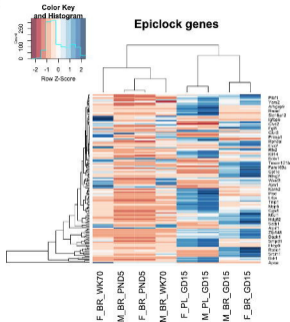

B

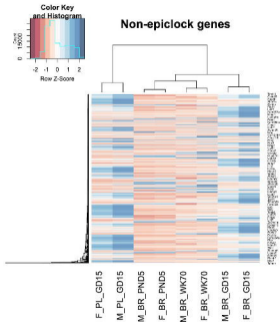

**A****FB (n=15269)**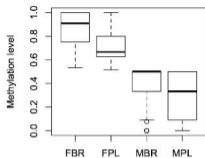**B****MB (n=17028)**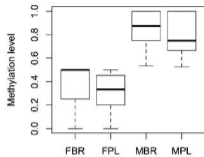**C**Chi-Square=12.7,  $P=0.0003$ 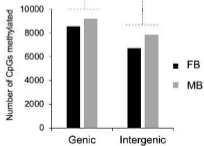**D**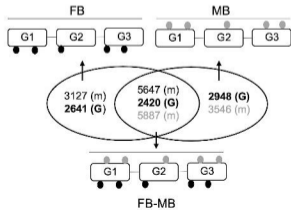

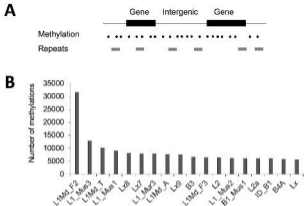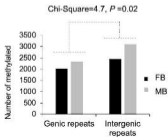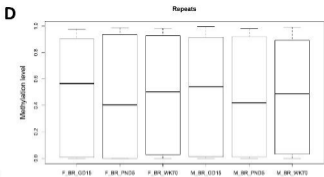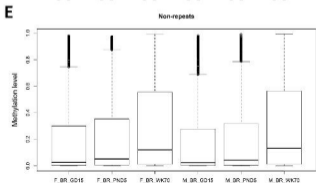

**A**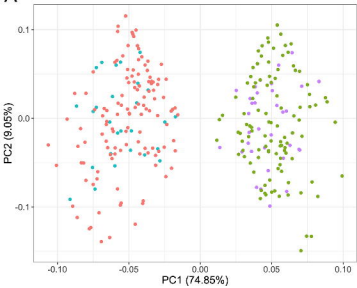**B**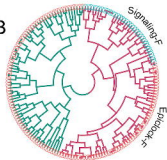**C**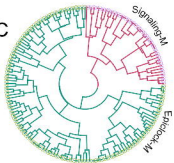**Type**

- Epidclock-F
- Epidclock-M
- Signaling-F
- Signaling-M

**A**

Female

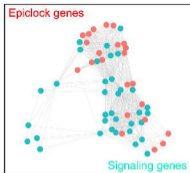**B**

Male

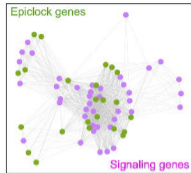**C**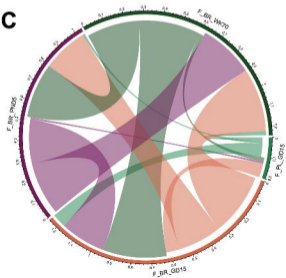**D**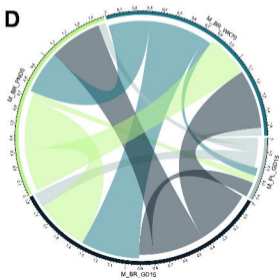

Source: https://www.biorxiv.org/content/10.1101/2022.02.02.478867v1.full.pdf
